# Supplementary material
Source: ML conference proceedings conference paper supplement (https://openaccess.thecvf.com/content/ACCV2024/html/Chen_Beyond_Coarse-Grained_Matching_ACCV_2024_paper.html)
Supplement: Supplementary file 1 [file Chen_Beyond_Coarse-Grained_Matching_ACCV_2024_supplemental.pdf]

# Supplementary Materials

## Beyond Coarse-Grained Matching in Video-Text Retrieval

### A Further Analysis of the Fine-Grained Ability of Current Models

We show the *PosRank* performance for individual parts-of-speech for all methods on VATEX and VLN-OOPS in Fig. A. We see similar trends as in Figure 6 of the main paper. Particularly, current models are better at distinguishing differences in adjectives and nouns and worse at distinguishing differences in adverbs and prepositions.

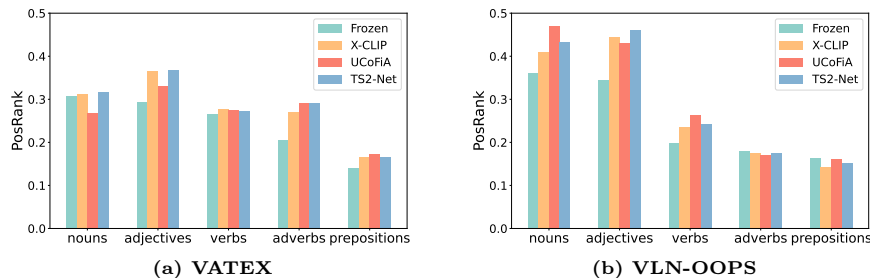

**Fig. A: Fine-Grained Evaluation Per Part of Speech.** Models find fine-grained differences in adverbs and prepositions the most difficult to distinguish.

### B Implementation Details of our Fine-grained Training

X-CLIP, TS2Net, and UCoFiA use the visual and text encoder from CLIP (ViT-B/32) [2], while Frozen uses a variant of ViT and DistilBERT [3] pretrained on WebVid-2M [1]. The training configurations are consistent with the original publications, All models are optimized with Adam. For X-CLIP, TS2Net and UCoFiA are trained for 5 epochs with a batch size of 64, the initial learning rate for visual and text encoder is  $1e-7$ , and the initial learning rate for other modules is  $1e-4$ . For Frozen, we set a learning rate of  $1e-5$  with a maximum of 100 epochs, with early stopping if validation performance did not improve for 10 consecutive epochs, using a batch size of 32.

### C Effect of the Number of Visual Prompts $\mathbb{T}$

We explore the impact of the number of visual prompts in Tab. A. With more than one visual prompt we mean-pool the embedding of all prompts for the

fine-grained representation. Using any number of visual prompts  $\mathbb{T}>0$  to better separate coarse and fine-grained objectives provides an increase in results. There is a small increase for coarse-grained evaluation with  $\mathbb{T}>1$  however,  $\mathbb{T}=1$  provides the best balance between coarse and fine-grained performance and training efficiency.

**Table A: Number of visual prompts  $\mathbb{T}$ .**  $\mathbb{T}=1$  provides a reasonable balance between performance and training efficiency.

| $\mathbb{T}$ | Coarse-Grained ( $\uparrow$ ) |      | Fine-Grained ( $\uparrow$ ) |       |       |       |       |
|--------------|-------------------------------|------|-----------------------------|-------|-------|-------|-------|
|              | V2T                           | T2V  | noun                        | adj   | verb  | adv   | prep  |
| 0            | 47.5                          | 40.0 | 0.894                       | 0.864 | 0.969 | 0.468 | 0.701 |
| 1            | 53.1                          | 39.3 | 0.858                       | 0.832 | 0.960 | 0.501 | 0.668 |
| 2            | 54.0                          | 39.8 | 0.859                       | 0.796 | 0.953 | 0.472 | 0.519 |
| 4            | 54.0                          | 40.2 | 0.854                       | 0.798 | 0.950 | 0.424 | 0.477 |
| 8            | 52.5                          | 39.7 | 0.841                       | 0.783 | 0.954 | 0.419 | 0.512 |

## D Variance of Results

The table below shows the variance from 3 runs of our full model on VLU-UVO, verifying that the variance of our approach is low.

| Coarse-Grained ( $\uparrow$ ) |     | Fine-Grained ( $\uparrow$ ) |          |          |        |        |
|-------------------------------|-----|-----------------------------|----------|----------|--------|--------|
| V2T                           | T2V | noun                        | adj      | verb     | adv    | prep   |
| 0.03                          | 0.2 | 0.000007                    | 0.000009 | 0.000001 | 0.0002 | 0.0009 |

## References

1. Bain, M., Nagrani, A., Varol, G., Zisserman, A.: Frozen in time: A joint video and image encoder for end-to-end retrieval. In: ICCV (2021) [1](#)
2. Radford, A., Kim, J.W., Hallacy, C., Ramesh, A., Goh, G., Agarwal, S., Sastry, G., Askell, A., Mishkin, P., Clark, J., Krueger, G., Sutskever, I.: Learning transferable visual models from natural language supervision. In: ICML (2021) [1](#)
3. Sanh, V., Debut, L., Chaumond, J., Wolf, T.: Distilbert, a distilled version of bert: smaller, faster, cheaper and lighter. In: EMC2@NeurIPS (2019) [1](#)
